# Supplementary material for: Homeobox Transcription Factors Are Required for Conidiation and Appressorium Development in the Rice Blast Fungus Magnaporthe oryzae
Source: PubMed Central journal article supplement (PMC2779367; doi:10.1371/journal.pgen.1000757), 2009-12-04
Supplement: pgen.1000757.s007.pdf [file pgen.1000757.s007.pdf]

Table S3. Effect of the pharmacological signaling molecules on appressorium formation.

| Surface     | Strain                 | Appressorium formation (%) |                 |                |                     |                           |                  |
|-------------|------------------------|----------------------------|-----------------|----------------|---------------------|---------------------------|------------------|
|             |                        | No treatment               | HDD (1 $\mu$ M) | cAMP (10 mM)   | DOG (20 $\mu$ g/ml) | CaCl <sub>2</sub> (10 mM) | Treatment of all |
| Hydrophilic | Wild-type              | 2.6 $\pm$ 0.7              | 63.7 $\pm$ 4.3  | 43.7 $\pm$ 4.2 | 83.4 $\pm$ 7.7      | 5.8 $\pm$ 1.5             | 92.2 $\pm$ 1.1   |
|             | $\Delta$ <i>Mohox7</i> | 0.3 $\pm$ 0.5              | 0.9 $\pm$ 0.1   | 1.1 $\pm$ 0.5  | 0.6 $\pm$ 0.5       | 1.6 $\pm$ 0.5             | 3.0 $\pm$ 1.1    |
| Hydrophobic | Wild-type              | 99.7 $\pm$ 0.5             | 98.8 $\pm$ 1.0  | 97.5 $\pm$ 0.8 | 97.9 $\pm$ 2.2      | 98.6 $\pm$ 0.5            | 98.8 $\pm$ 0.5   |
|             | $\Delta$ <i>Mohox7</i> | 0.3 $\pm$ 0.5              | 1.1 $\pm$ 0.5   | 0.9 $\pm$ 0.8  | 1.3 $\pm$ 0.6       | 0.6 $\pm$ 0.5             | 3.2 $\pm$ 1.3    |

Effects of chemicals on appressorium formation were investigated. Conidial suspension ( $10^5$  conidia/ml) was placed on either the hydrophobic or hydrophilic side of cover slips, and mixed with following solutions to final concentrations: 10 mM cAMP (Sigma-aldrich, St. Louis, MO, USA), 1  $\mu$ M 1,16-hexadecandiol (HDD, Sigma-aldrich), 20  $\mu$ g/ml 1,2-dioctanoyl-*sn*-glycerol (DOG, Sigma-Aldrich), or 10 mM CaCl<sub>2</sub>·2H<sub>2</sub>O. Appressorium formation was observed under a microscope 18 h after incubation.
